# Supplementary material for: Quorum Quenching Strains Isolated from the Microbiota of Sea Anemones and Holothurians Attenuate Vibrio corallilyticus Virulence Factors and Reduce Mortality in Artemia salina
Source: MDPI journal article supplement (doi:10.3390/microorganisms10030631), 2022-03-16
Supplement: s1 [file s1]

Supplementary Materials

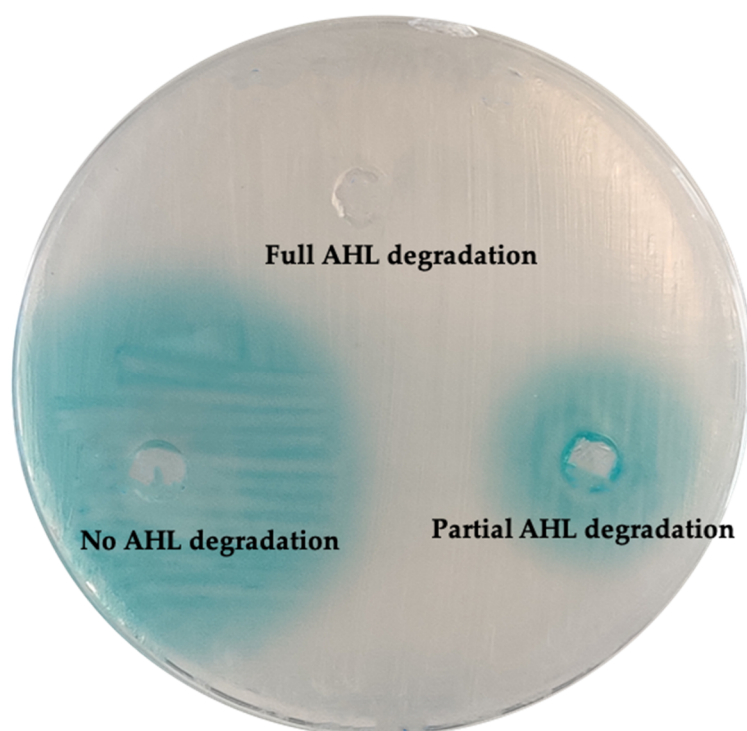

**Figure S1.** Diffusion agar-plate assay to detect AHLs using the biosensor *Agrobacterium tumefaciens* NTL4 (pZLR4). The size of halo diameter indicate AHL degradation activity.

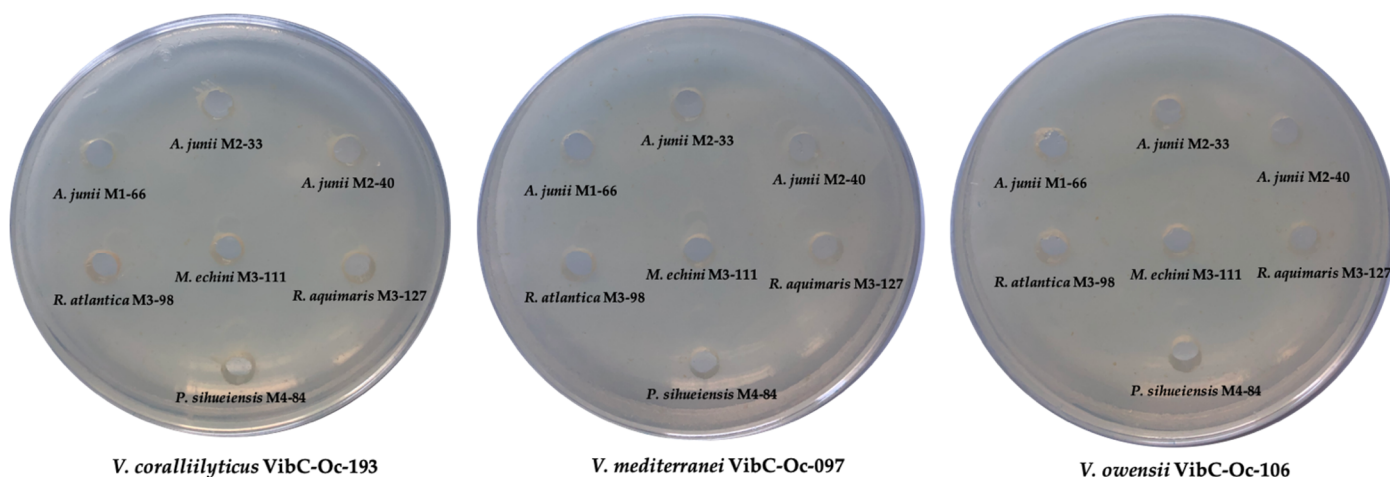

**Figure S2.** Determination of remaining AHLs after 24 h incubation of cocultures with AHL-degrading strains and *Vibrio* spp. using diffusion agar-plate assay with *Agrobacterium tumefaciens* NTL4 (pZLR4).

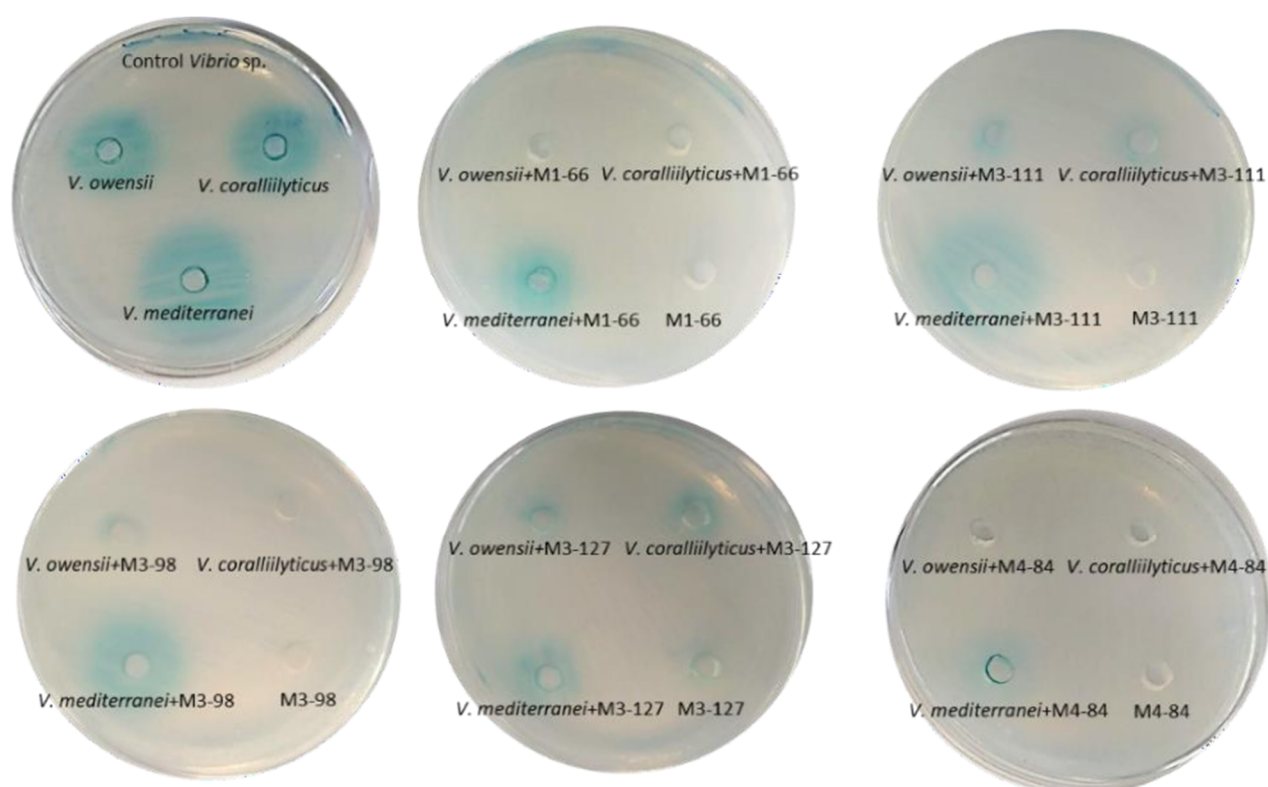

**Figure S3.** Detection of growth inhibition of *Vibrio* spp. by the AHL-degrading strains. Growth inhibition was detected by loading 100- $\mu$ L aliquots of cell-free supernatant of each AHL-degrading culture strain in wells made on the surface AM medium plates. An overlay of the strains *V. coralliilyticus* VibC-Oc-193, *V. mediterranei* VibC-Oc-097 and *V. owensii* VibC-Oc-106 was previously placed, respectively.

**Table S1.** Phenotypes of *V. coralliilyticus* VibC-Oc-193 after co-culturing with AHL-degrading strains.

|                                         | Amylase | Hemolysin | swarming | swimming | DNAase | Caseinase | Tween 20 | Alkaline phosphatase |
|-----------------------------------------|---------|-----------|----------|----------|--------|-----------|----------|----------------------|
| <b>VibC-Oc-193</b>                      | ++      | ++        | ++       | +++      | ++     | ++        | ++       | ++                   |
| <i>Acinetobacter junii</i> M1-66        | -       | -         | -        | -        | -      | -         | ++       | +                    |
| <i>A. junii</i> M1-66 + VibC-Oc-193     | +       | -         | ++       | +++      | ++     | ++        | ++       | ++                   |
| <i>A. junii</i> M2-33                   | +       | -         | ++       | ++       | ++     | ++        | ++       | -                    |
| <i>A. junii</i> M2-33 + VibC-Oc-193     | +       | +         | ++       | +++      | ++     | ++        | ++       | ++                   |
| <i>A. junii</i> M2-40                   | +       | -         | -        | -        | +      | -         | ++       | +                    |
| <i>A. junii</i> M2-40 + VibC-Oc-193     | ++      | ++        | ++       | +++      | +      | ++        | ++       | ++                   |
| <i>Ruegeria atlantica</i> M3-98         | +       | -         | -        | -        | -      | -         | -        | +                    |
| <i>R. atlantica</i> M3-98 + VibC-Oc-193 | ++      | +         | ++       | +++      | ++     | ++        | ++       | ++                   |
| <i>Microbulbifer echini</i> M3-111      | +       | ++        | -        | ++       | ++     | +         | ++       | ++                   |

|                                          |    |    |    |     |    |    |    |    |
|------------------------------------------|----|----|----|-----|----|----|----|----|
| <i>M. echini</i> M3-111 + VibC-Oc-193    | +  | ++ | -  | ++  | ++ | ++ | ++ | ++ |
| <i>Rheinheimera aquimaris</i> M3-127     | ++ | -  | ++ | ++  | ++ | ++ | ++ | +  |
| <i>R. aquimaris</i> M3-127 + VibC-Oc-193 | ++ | +  | ++ | +++ | ++ | ++ | ++ | ++ |
| <i>Pseudomonas sihuiensis</i> M4-84      | -  | -  | ++ | ++  | -  | -  | ++ | +  |
| <i>P. sihuiensis</i> M4-84 + VibC-Oc-193 | -  | -  | ++ | +++ | +  | ++ | ++ | +  |

“+++ and ++” strong activity, “+” medium activity and “-” no activity
